# Supplementary material
Source: publisher figshare collection journal article supplement (https://acs.figshare.com/ndownloader/files/5191528)
Supplement: Supplementary file 1 [file 5191528]

## Experimental Methods:

Tetrakis(thiourea)dichlorotellurium(II) dihydrate was prepared by the method of Foss et al.<sup>8</sup>

Tetrakis(thiourea)dichlorotellurium(II) dihydrate and sodium hydro-tris(methimazolyl)borate were mixed in methanol in a 1:2 ratio. The solution was stirred for 3 hrs and the solid produced collected and extracted with  $\text{CHCl}_3$ . The product obtained from solvent evaporation was essentially pure. However, the material can be recrystallized from  $\text{CHCl}_3$ /hexane by vapor diffusion from which the X-ray quality crystals were obtained (yield 65%).

Anal. Calcd for  $\text{C}_{24}\text{H}_{32}\text{N}_{12}\text{S}_6\text{B}_2\text{Te}$  C, 34.75; H, 3.86; N, 20.26. Found: C, 34.35; H, 3.81; N, 19.45.  $^1\text{H}$  NMR (400 MHz,  $\text{d}^6$  dmso @  $20^\circ\text{C}$ )  $\delta$  7.29, s (broad), 1H, CH;  $\delta$  6.79, s (broad), 1H, CH;  $\delta$  3.51, 3H, NMe. IR (KBr  $\text{cm}^{-1}$ ) 2509 ( $\nu_{\text{B-H}}$ ), 738 ( $\nu_{\text{C=S}}$ ). MS (FAB)  $m/z$  833.03 (molecular ion). Crystal data: yellow prism ( $0.30 \times 0.10 \times 0.08$  mm),  $\text{C}_{24}\text{H}_{32}\text{B}_2\text{N}_{12}\text{S}_6\text{Te}_1 \cdot 2\text{CHCl}_3$ ,  $M = 1068.93$ , Monoclinic, Space group  $\text{P2}_1/\text{a}$  (No. 14),  $a = 15.1347(2)$  Å,  $b = 19.4830(3)$  Å,  $c = 15.2672(3)$  Å,  $\beta = 105.6840(10)^\circ$ ,  $V = 4334.21(12)$  Å<sup>3</sup>,  $Z = 4$ ,  $D_c = 1.638$  g  $\text{cm}^{-3}$ ,  $T = 150$  K,  $\mu$  (Mo  $\text{K}\alpha$ ) =  $1.383$  mm<sup>-1</sup>, 32215 reflections measured, 9553 unique reflections ( $R_{\text{int}} = 0.0628$ ),  $R_1$  (all data) = 0.0665,  $wR_2 = 0.0952$ , 476 parameters.

Bismuth trichloride and sodium hydrotris-(pyrazolyl)borate were mixed in cold acetone ( $0^\circ\text{C}$ ) in a 1:3 ratio and stirred for 3 hrs in a salt/ice bath. The solution was rapidly filtered to remove the sodium chloride and bismuth solids. The acetone was removed slowly in aliquots under a stream of  $\text{N}_2$  at  $0^\circ\text{C}$ , after which the sample was returned to the freezer ( $-25^\circ\text{C}$ ). A white powder formed amongst which a small number of X-ray quality crystals were found (yield 18%).

Anal. Calcd for  $\text{C}_{21}\text{H}_{24}\text{N}_{14}\text{B}_2\text{BiCl}$ : C, 34.15; H, 3.28; N, 26.55. Found: C, 35.47; H, 3.19; N, 27.21. Crystal data: colourless fragment ( $0.20 \times 0.15 \times 0.10$ ),  $\text{C}_{21}\text{H}_{24}\text{B}_2\text{BiCl}_1\text{N}_{14}$ ,  $M = 738.59$ , Orthorhombic, space group  $\text{Pbca}$  (No. 61)  $a = 15.716(7)$  Å,  $b = 37.40(10)$  Å,  $c = 9.236(2)$  Å,  $V = 5428(2)$  Å<sup>3</sup>,  $Z = 8$ ,  $D_c = 1.807$  g  $\text{cm}^{-3}$ ,  $T = 291$  K,  $\mu$  (Mo  $\text{K}\alpha$ ) =  $6.623$ , absorption correction DIFABS ( $T_{\text{max}} = 1.000$ ,  $T_{\text{min}} = 0.798$ ), 6043 reflections measured, 5366 unique reflections ( $R_{\text{int}} = 0.101$ ),  $R_1$  (all data) = 0.0489, GOF = 1.188.
